# Supplementary material for: A nanocomposite of NiFe2O4–PANI as a duo active electrocatalyst toward the sensitive colorimetric and electrochemical sensing of ascorbic acid
Source: Royal Society of Chemistry journal article supplement (doi:10.1039/d0na00283f), 2020-01-01
Supplement: d0na00283f1.pdf [file d0na00283f1.pdf]

### Electronic Supplementary Information

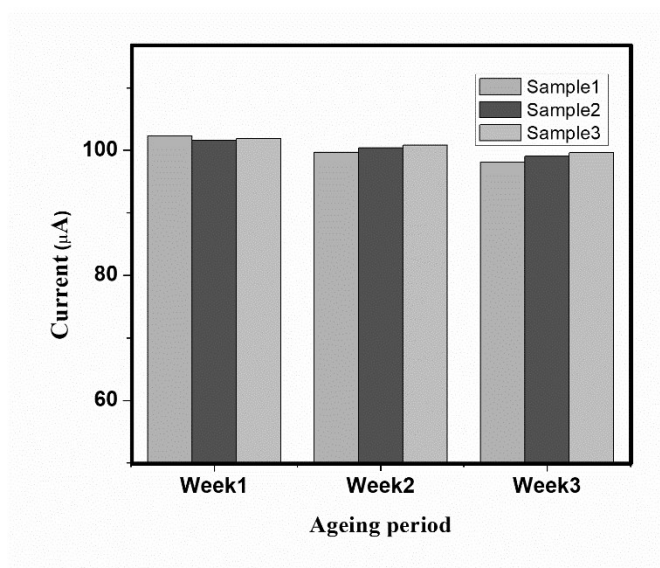

SI.1: Repeatability and Reproducibility of the sample carried out with three different electrodes prepared with the same sample denoted as sample 1, 2 and 3. The electrode was aged for three weeks and every week the analysis is carried out in all three samples
